# Supplementary material for: Mirtazapine exerts astrocyte-mediated dopaminergic neuroprotection
Source: PubMed Central journal article supplement (PMC7693322; doi:10.1038/s41598-020-77652-4), 2020-11-26
Supplement: 41598_2020_77652_MOESM2_ESM.pdf [file 41598_2020_77652_MOESM2_ESM.pdf]

Revised Supplementary Files

Revised supplementary file1: revised supplementary figures 1-4

Revised supplementary file2: revised supplementary dataset

**Mirtazapine exerts astrocyte-mediated dopaminergic neuroprotection**

Ryo Kikuoka<sup>1</sup>, Ikuko Miyazaki<sup>1</sup>, Natsuki Kubota<sup>1</sup>, Megumi Maeda<sup>1</sup>, Daiki Kagawa<sup>1</sup>, Masaaki Moriyama<sup>1</sup>, Asuka Sato<sup>1</sup>, Shinki Murakami<sup>1</sup>, Yoshihisa Kitamura<sup>2</sup>, Toshiaki Sendo<sup>2</sup>, Masato Asanuma<sup>1, \*</sup>

<sup>1</sup> *Department of Medical Neurobiology, Okayama University Graduate School of Medicine, Dentistry and Pharmaceutical Sciences, Okayama, Japan*

<sup>1</sup> *Department of Clinical Pharmacy, Okayama University Graduate School of Medicine, Dentistry and Pharmaceutical Sciences, Okayama, Japan*

\*Corresponding author:

Prof. Masato Asanuma, MD, PhD,

Department of Medical Neurobiology, Okayama University Graduate School of Medicine, Dentistry and Pharmaceutical Sciences

2-5-1 Shikata-cho, Kita-ku, Okayama, 700-8558, Japan

Tel: +81-86-235-7096

| Figure number          |                   | group                  | n | P value                                                                                                                                                                                                                                                                                                                                 | F/t Values         | Test type                                            |
|------------------------|-------------------|------------------------|---|-----------------------------------------------------------------------------------------------------------------------------------------------------------------------------------------------------------------------------------------------------------------------------------------------------------------------------------------|--------------------|------------------------------------------------------|
| 1c                     | TH positive cells |                        |   | $p = 0.00015$                                                                                                                                                                                                                                                                                                                           | $F(5,35) = 7.241$  | one-way ANOVA followed by post-hoc Fisher's LSD test |
|                        | control side      | vehicle                | 6 | $p = 0.821$ (vs. same side of vehicle-treated group)<br>$p = 0.0819$ (vs. same side of vehicle-treated group)                                                                                                                                                                                                                           |                    |                                                      |
|                        |                   | mirtazapine (5 mg/kg)  | 6 |                                                                                                                                                                                                                                                                                                                                         |                    |                                                      |
|                        |                   | mirtazapine (16 mg/kg) | 6 |                                                                                                                                                                                                                                                                                                                                         |                    |                                                      |
|                        | lesioned side     | vehicle                | 6 | $p = 0.001$ (vs. control side of each group)<br>$p = 0.0741$ (vs. same side of vehicle-treated group)<br>$p = 0.0515$ (vs. control side of each group)<br>$p = 0.0007$ (vs. same side of vehicle-treated group)<br>$p = 0.0603$ (vs. same side of mirtazapine (5 mg/kg)-treated group)<br>$p = 0.1908$ (vs. control side of each group) |                    |                                                      |
|                        |                   | mirtazapine (5 mg/kg)  | 6 |                                                                                                                                                                                                                                                                                                                                         |                    |                                                      |
| mirtazapine (16 mg/kg) |                   | 6                      |   |                                                                                                                                                                                                                                                                                                                                         |                    |                                                      |
| 1f                     | TH                |                        |   | $p < 0.0001$                                                                                                                                                                                                                                                                                                                            | $F(5,31) = 10.339$ | one-way ANOVA followed by post-hoc Fisher's LSD test |
|                        | control side      | vehicle                | 5 | $p = 0.1108$ (vs. same side of vehicle-treated group)<br>$p = 0.165$ (vs. same side of vehicle-treated group)                                                                                                                                                                                                                           |                    |                                                      |
|                        |                   | mirtazapine            | 5 |                                                                                                                                                                                                                                                                                                                                         |                    |                                                      |
|                        |                   | mirtazapine + WAY      | 6 |                                                                                                                                                                                                                                                                                                                                         |                    |                                                      |
|                        | lesioned side     | vehicle                | 5 | $p = 0.0009$ (vs. control side of each group)<br>$p = 0.0042$ (vs. same side of vehicle-treated group)<br>$p = 0.0323$ (vs. control side of each group)<br>$p = 0.879$ (vs. same side of vehicle-treated group)<br>$p = 0.0043$ (vs. same side of mirtazapine-treated group)<br>$p = 0.0002$ (vs. control side of each group)           |                    |                                                      |
|                        |                   | mirtazapine            | 5 |                                                                                                                                                                                                                                                                                                                                         |                    |                                                      |
| mirtazapine + WAY      |                   | 6                      |   |                                                                                                                                                                                                                                                                                                                                         |                    |                                                      |
| 2b                     | S100 $\beta$      |                        |   | $p < 0.0001$                                                                                                                                                                                                                                                                                                                            | $F(5,35) = 12.377$ | one-way ANOVA followed by post-hoc Fisher's LSD test |
|                        | control side      | vehicle                | 6 | $p = 0.0026$ (vs. same side of vehicle-treated group)<br>$p = 0.0181$ (vs. same side of vehicle-treated group)                                                                                                                                                                                                                          |                    |                                                      |
|                        |                   | mirtazapine (5 mg/kg)  | 6 |                                                                                                                                                                                                                                                                                                                                         |                    |                                                      |
|                        |                   | mirtazapine (16 mg/kg) | 6 |                                                                                                                                                                                                                                                                                                                                         |                    |                                                      |
|                        | lesioned side     | vehicle                | 6 | $p = 0.0072$ (vs. control side of each group)<br>$p = 0.023$ (vs. same side of vehicle-treated group)<br>$p = 0.0554$ (vs. control side of each group)<br>$p = 0.0001$ (vs. same side of vehicle-treated group)<br>$p < 0.0001$ (vs. control side of each group)                                                                        |                    |                                                      |
|                        |                   | mirtazapine (5 mg/kg)  | 6 |                                                                                                                                                                                                                                                                                                                                         |                    |                                                      |
|                        |                   | mirtazapine (16 mg/kg) | 6 |                                                                                                                                                                                                                                                                                                                                         |                    |                                                      |
|                        | S100 $\beta$ & MT |                        |   | $p < 0.0001$                                                                                                                                                                                                                                                                                                                            | $F(5,35) = 16.075$ |                                                      |
|                        | control side      | vehicle                | 6 | $p = 0.0025$ (vs. same side of vehicle-treated group)<br>$p = 0.0581$ (vs. same side of vehicle-treated group)                                                                                                                                                                                                                          |                    |                                                      |
|                        |                   | mirtazapine (5 mg/kg)  | 6 |                                                                                                                                                                                                                                                                                                                                         |                    |                                                      |
|                        |                   | mirtazapine (16 mg/kg) | 6 |                                                                                                                                                                                                                                                                                                                                         |                    |                                                      |
|                        | lesioned side     | vehicle                | 6 | $p = 0.0024$ (vs. control side of each group)<br>$p = 0.021$ (vs. same side of vehicle-treated group)<br>$p = 0.0202$ (vs. control side of each group)<br>$p < 0.0001$ (vs. same side of vehicle-treated group)<br>$p < 0.0001$ (vs. control side of each group)                                                                        |                    |                                                      |
| mirtazapine (5 mg/kg)  |                   | 6                      |   |                                                                                                                                                                                                                                                                                                                                         |                    |                                                      |
| mirtazapine (16 mg/kg) |                   | 6                      |   |                                                                                                                                                                                                                                                                                                                                         |                    |                                                      |
| 2d                     | GFAP              |                        |   | $p < 0.0001$                                                                                                                                                                                                                                                                                                                            | $F(5,35) = 32.815$ | one-way ANOVA followed by post-hoc Fisher's LSD test |
|                        | control side      | vehicle                | 6 | $p = 0.273$ (vs. same side of vehicle-treated group)<br>$p = 0.501$ (vs. same side of vehicle-treated group)                                                                                                                                                                                                                            |                    |                                                      |
|                        |                   | mirtazapine (5 mg/kg)  | 6 |                                                                                                                                                                                                                                                                                                                                         |                    |                                                      |
|                        |                   | mirtazapine (16 mg/kg) | 6 |                                                                                                                                                                                                                                                                                                                                         |                    |                                                      |
|                        | lesioned side     | vehicle                | 6 | $p = 0.0003$ (vs. control side of each group)<br>$p = 0.0065$ (vs. same side of vehicle-treated group)<br>$p < 0.0001$ (vs. control side of each group)<br>$p < 0.0001$ (vs. same side of vehicle-treated group)<br>$p < 0.0001$ (vs. control side of each group)                                                                       |                    |                                                      |
|                        |                   | mirtazapine (5 mg/kg)  | 6 |                                                                                                                                                                                                                                                                                                                                         |                    |                                                      |
|                        |                   | mirtazapine (16 mg/kg) | 6 |                                                                                                                                                                                                                                                                                                                                         |                    |                                                      |
|                        | GFAP & MT         |                        |   | $p < 0.0001$                                                                                                                                                                                                                                                                                                                            | $F(5,35) = 32.884$ |                                                      |
|                        | control side      | vehicle                | 6 | $p = 0.3295$ (vs. same side of vehicle-treated group)<br>$p = 0.495$ (vs. same side of vehicle-treated group)                                                                                                                                                                                                                           |                    |                                                      |
|                        |                   | mirtazapine (5 mg/kg)  | 6 |                                                                                                                                                                                                                                                                                                                                         |                    |                                                      |
|                        |                   | mirtazapine (16 mg/kg) | 6 |                                                                                                                                                                                                                                                                                                                                         |                    |                                                      |
|                        | lesioned side     | vehicle                | 6 | $p = 0.0005$ (vs. control side of each group)<br>$p = 0.005$ (vs. same side of vehicle-treated group)<br>$p < 0.0001$ (vs. control side of each group)<br>$p < 0.0001$ (vs. same side of vehicle-treated group)<br>$p < 0.0001$ (vs. control side of each group)                                                                        |                    |                                                      |
| mirtazapine (5 mg/kg)  |                   | 6                      |   |                                                                                                                                                                                                                                                                                                                                         |                    |                                                      |
| mirtazapine (16 mg/kg) |                   | 6                      |   |                                                                                                                                                                                                                                                                                                                                         |                    |                                                      |
| 2f                     | MT density        |                        |   | $p = 0.00089$                                                                                                                                                                                                                                                                                                                           | $F(5,35) = 5.629$  | one-way ANOVA followed by post-hoc Fisher's LSD test |
|                        | control side      | vehicle                | 6 | $p = 0.0554$ (vs. same side of vehicle-treated group)<br>$p = 0.458$ (vs. same side of vehicle-treated group)                                                                                                                                                                                                                           |                    |                                                      |
|                        |                   | mirtazapine (5 mg/kg)  | 6 |                                                                                                                                                                                                                                                                                                                                         |                    |                                                      |
|                        |                   | mirtazapine (16 mg/kg) | 6 |                                                                                                                                                                                                                                                                                                                                         |                    |                                                      |
|                        | lesioned side     | vehicle                | 6 | $p = 0.13$ (vs. control side of each group)<br>$p = 0.315$ (vs. same side of vehicle-treated group)<br>$p = 0.564$ (vs. control side of each group)<br>$p = 0.00027$ (vs. same side of vehicle-treated group)<br>$p = 0.0003$ (vs. control side of each group)<br>$p = 0.0318$ (vs. same side of mirtazapine (5 mg/kg)-treated group)   |                    |                                                      |
|                        |                   | mirtazapine (5 mg/kg)  | 6 |                                                                                                                                                                                                                                                                                                                                         |                    |                                                      |
| mirtazapine (16 mg/kg) |                   | 6                      |   |                                                                                                                                                                                                                                                                                                                                         |                    |                                                      |
| 3b                     | S100 $\beta$      |                        |   | $p = 0.0406$                                                                                                                                                                                                                                                                                                                            | $F(2,15) = 4.14$   | one-way ANOVA followed by post-hoc Fisher's LSD test |
|                        |                   | vehicle                | 5 | $p = 0.0142$ (vs. vehicle-treated group)<br>$p = 0.317$ (vs. vehicle-treated group)<br>$p = 0.0774$ (vs. mirtazapine-treated group)                                                                                                                                                                                                     |                    |                                                      |
|                        |                   | mirtazapine            | 5 |                                                                                                                                                                                                                                                                                                                                         |                    |                                                      |
|                        |                   | mirtazapine + WAY      | 6 |                                                                                                                                                                                                                                                                                                                                         |                    |                                                      |
|                        | S100 $\beta$ & MT |                        |   | $p = 0.00717$                                                                                                                                                                                                                                                                                                                           | $F(2,15) = 7.395$  |                                                      |
|                        |                   | vehicle                | 5 | $p = 0.0249$ (vs. vehicle-treated group)<br>$p = 0.274$ (vs. vehicle-treated group)<br>$p = 0.0022$ (vs. mirtazapine-treated group)                                                                                                                                                                                                     |                    |                                                      |
| mirtazapine            |                   | 5                      |   |                                                                                                                                                                                                                                                                                                                                         |                    |                                                      |
| mirtazapine + WAY      |                   | 6                      |   |                                                                                                                                                                                                                                                                                                                                         |                    |                                                      |
| 3d                     | GFAP              |                        |   | $p = 0.207$                                                                                                                                                                                                                                                                                                                             | $F(2,15) = 1.776$  | one-way ANOVA followed by post-hoc Fisher's LSD test |
|                        |                   | vehicle                | 5 |                                                                                                                                                                                                                                                                                                                                         |                    |                                                      |
|                        |                   | mirtazapine            | 5 |                                                                                                                                                                                                                                                                                                                                         |                    |                                                      |
|                        |                   | mirtazapine + WAY      | 6 |                                                                                                                                                                                                                                                                                                                                         |                    |                                                      |
|                        | GFAP & MT         |                        |   | $p = 0.00109$                                                                                                                                                                                                                                                                                                                           | $F(2,15) = 12.073$ |                                                      |
|                        |                   | vehicle                | 5 | $p = 0.0141$ (vs. vehicle-treated group)<br>$p = 0.0738$ (vs. vehicle-treated group)<br>$p = 0.0003$ (vs. mirtazapine-treated group)                                                                                                                                                                                                    |                    |                                                      |
| mirtazapine            |                   | 5                      |   |                                                                                                                                                                                                                                                                                                                                         |                    |                                                      |
| mirtazapine + WAY      |                   | 6                      |   |                                                                                                                                                                                                                                                                                                                                         |                    |                                                      |
| 3f                     | MT density        |                        |   | $p = 0.00067$                                                                                                                                                                                                                                                                                                                           | $F(2,15) = 13.496$ | one-way ANOVA followed by post-hoc Fisher's LSD test |
|                        |                   | vehicle                | 5 | $p = 0.005$ (vs. vehicle-treated group)<br>$p = 0.132$ (vs. vehicle-treated group)<br>$p = 0.0002$ (vs. mirtazapine-treated group)                                                                                                                                                                                                      |                    |                                                      |
|                        |                   | mirtazapine            | 5 |                                                                                                                                                                                                                                                                                                                                         |                    |                                                      |
|                        |                   | mirtazapine + WAY      | 6 |                                                                                                                                                                                                                                                                                                                                         |                    |                                                      |

|    |                                  |                                                                                                           |                       |                                                                                                                                                                                                                                                                                                                                                                                                                                                                                                                                                         |                   |                                                      |
|----|----------------------------------|-----------------------------------------------------------------------------------------------------------|-----------------------|---------------------------------------------------------------------------------------------------------------------------------------------------------------------------------------------------------------------------------------------------------------------------------------------------------------------------------------------------------------------------------------------------------------------------------------------------------------------------------------------------------------------------------------------------------|-------------------|------------------------------------------------------|
| 4a | TH positive cells                |                                                                                                           |                       | p < 0.0001                                                                                                                                                                                                                                                                                                                                                                                                                                                                                                                                              | F (7,23) = 43.986 | one-way ANOVA followed by post-hoc Fisher's LSD test |
|    | control                          | 6-OHDA (0 μM)<br>6-OHDA (10 μM)<br>6-OHDA (25 μM)<br>6-OHDA (50 μM)                                       | 3<br>3<br>3<br>3      | p = 0.0011 (vs. 6-OHDA (0 μM) group)<br>p < 0.0001 (vs. 6-OHDA (0 μM) group)<br>p < 0.0001 (vs. 6-OHDA (0 μM) group)                                                                                                                                                                                                                                                                                                                                                                                                                                    |                   |                                                      |
|    | Mirtazapine (10 μM)              | 6-OHDA (0 μM)<br>6-OHDA (10 μM)<br>6-OHDA (25 μM)<br>6-OHDA (50 μM)                                       | 3<br>3<br>3<br>3      | p = 0.009 (vs. Mirtazapine (10 μM)+6-OHDA (0 μM) group)<br>p = 0.756 (vs. control+6-OHDA (10 μM) group)<br>p = 0.0002 (vs. Mirtazapine (10 μM)+6-OHDA (0 μM) group)<br>p = 0.599 (vs. control+6-OHDA (25 μM) group)<br>p < 0.0001 (vs. Mirtazapine (10 μM)+6-OHDA (0 μM) group)<br>p = 0.404 (vs. control+6-OHDA (50 μM) group)                                                                                                                                                                                                                         |                   |                                                      |
| 4b | TH positive cells                |                                                                                                           |                       | p < 0.0001                                                                                                                                                                                                                                                                                                                                                                                                                                                                                                                                              | F (7,23) = 54.075 | one-way ANOVA followed by post-hoc Fisher's LSD test |
|    | control                          | 6-OHDA (0 μM)<br>6-OHDA (50 μM)<br>6-OHDA (100 μM)<br>6-OHDA (150 μM)                                     | 3<br>3<br>3<br>3      | p = 0.002 (vs. 6-OHDA (0 μM) group)<br>p < 0.0001 (vs. 6-OHDA (0 μM) group)<br>p < 0.0001 (vs. 6-OHDA (0 μM) group)                                                                                                                                                                                                                                                                                                                                                                                                                                     |                   |                                                      |
|    | Mirtazapine (10 μM)              | 6-OHDA (0 μM)<br>6-OHDA (50 μM)<br>6-OHDA (100 μM)<br>6-OHDA (150 μM)                                     | 3<br>3<br>3<br>3      | p = 0.225 (vs. Mirtazapine (10 μM)+6-OHDA (0 μM) group)<br>p = 0.0003 (vs. control+6-OHDA (50 μM) group)<br>p = 0.0005 (vs. Mirtazapine (10 μM)+6-OHDA (0 μM) group)<br>p < 0.0001 (vs. control+6-OHDA (100 μM) group)<br>p < 0.0001 (vs. Mirtazapine (10 μM)+6-OHDA (0 μM) group)<br>p = 0.0275 (vs. control+6-OHDA (150 μM) group)                                                                                                                                                                                                                    |                   |                                                      |
| 4c | TH positive cells                |                                                                                                           |                       | p < 0.0001                                                                                                                                                                                                                                                                                                                                                                                                                                                                                                                                              | F (7,35) = 93.897 | one-way ANOVA followed by post-hoc Fisher's LSD test |
|    | control                          | control<br>WAY100635 (10 nM)<br>Mirtazapine (10 μM)                                                       | 4<br>4<br>4           | p = 0.612 (vs. control+6-OHDA (0 μM) group)<br>p = 0.795 (vs. control+6-OHDA (0 μM) group)                                                                                                                                                                                                                                                                                                                                                                                                                                                              |                   |                                                      |
|    | 6-OHDA (100 μM)                  | WAY100635 + mirtazapine<br>control<br>WAY100635 (10 nM)<br>Mirtazapine (10 μM)<br>WAY100635 + mirtazapine | 6<br>4<br>4<br>4<br>6 | p = 0.936 (vs. control+6-OHDA (0 μM) group)<br>p < 0.0001 (vs. control+6-OHDA (0 μM) group)<br>p < 0.0001 (vs. WAY+6-OHDA (0 μM) group)<br>p = 0.0108 (vs. control+6-OHDA (100 μM) group)<br>p = 0.0003 (vs. Mirtazapine (10 μM)+6-OHDA (100 μM) group)<br>p < 0.0001 (vs. Mirtazapine (10 μM)+6-OHDA (0 μM) group)<br>p < 0.0001 (vs. control+6-OHDA (100 μM) group)<br>p < 0.0001 (vs. WAY + mirtazapine (10 μM)+6-OHDA (0 μM) group)<br>p = 0.0479 (vs. control+6-OHDA (100 μM) group)<br>p < 0.0001 (vs. Mirtazapine (10 μM)+6-OHDA (100 μM) group) |                   |                                                      |
| 5a | number of astrocyte              |                                                                                                           |                       | p = 0.714                                                                                                                                                                                                                                                                                                                                                                                                                                                                                                                                               | F (3,95) = 0.454  | one-way ANOVA followed by post-hoc Fisher's LSD test |
|    | control                          | Mirtazapine (2.5 μM)<br>Mirtazapine (5 μM)<br>Mirtazapine (10 μM)                                         | 24<br>24<br>24<br>24  |                                                                                                                                                                                                                                                                                                                                                                                                                                                                                                                                                         |                   |                                                      |
| 5b | number of astrocyte              |                                                                                                           |                       | p = 0.0144                                                                                                                                                                                                                                                                                                                                                                                                                                                                                                                                              | F (7,79) = 3.747  | one-way ANOVA followed by post-hoc Fisher's LSD test |
|    | control-NCM                      | Mir (2.5 μM)-NCM<br>Mir (5 μM)-NCM<br>Mir (10 μM)-NCM                                                     | 20<br>20<br>20<br>20  | p = 0.227 (vs. control-NCM group)<br>p = 0.003 (vs. control-NCM group)<br>p = 0.0147 (vs. control-NCM group)                                                                                                                                                                                                                                                                                                                                                                                                                                            |                   |                                                      |
| 5c | number of astrocyte              |                                                                                                           |                       | p = 0.00297                                                                                                                                                                                                                                                                                                                                                                                                                                                                                                                                             | F (3,95) = 4.992  | one-way ANOVA followed by post-hoc Fisher's LSD test |
|    | control-NCM                      | control-NCM + WAY<br>Mir (10 μM)-NCM<br>Mir (10 μM)-NCM + WAY                                             | 24<br>24<br>24<br>24  | p = 0.678 (vs. control-NCM group)<br>p = 0.0026 (vs. control-NCM group)<br>p = 0.188 (vs. control-NCM group)<br>p = 0.0804 (vs. Mir-NCM group)                                                                                                                                                                                                                                                                                                                                                                                                          |                   |                                                      |
| 6b | number of MT-immunopositive cell |                                                                                                           |                       | p = 0.47                                                                                                                                                                                                                                                                                                                                                                                                                                                                                                                                                | F (3,71) = 0.851  | one-way ANOVA followed by post-hoc Fisher's LSD test |
|    | control                          | Mirtazapine (2.5 μM)<br>Mirtazapine (5 μM)<br>Mirtazapine (10 μM)                                         | 18<br>18<br>18<br>18  |                                                                                                                                                                                                                                                                                                                                                                                                                                                                                                                                                         |                   |                                                      |
| 6c | MT density                       |                                                                                                           |                       | p = 0.7                                                                                                                                                                                                                                                                                                                                                                                                                                                                                                                                                 | F (3,71) = 0.475  | one-way ANOVA followed by post-hoc Fisher's LSD test |
|    | control                          | Mirtazapine (2.5 μM)<br>Mirtazapine (5 μM)<br>Mirtazapine (10 μM)                                         | 18<br>18<br>18<br>18  |                                                                                                                                                                                                                                                                                                                                                                                                                                                                                                                                                         |                   |                                                      |
| 6e | number of MT-immunopositive cell |                                                                                                           |                       | p < 0.0001                                                                                                                                                                                                                                                                                                                                                                                                                                                                                                                                              | F (3,53) = 33.796 | one-way ANOVA followed by post-hoc Fisher's LSD test |
|    | control-NCM                      | Mir (2.5 μM)-NCM<br>Mir (5 μM)-NCM<br>Mir (10 μM)-NCM                                                     | 16<br>13<br>11<br>14  | p < 0.0001 (vs. control-NCM group)<br>p < 0.0001 (vs. control-NCM group)<br>p < 0.0001 (vs. control-NCM group)                                                                                                                                                                                                                                                                                                                                                                                                                                          |                   |                                                      |
| 6f | MT density                       |                                                                                                           |                       | p = 0.00178                                                                                                                                                                                                                                                                                                                                                                                                                                                                                                                                             | F (3,53) = 5.785  | one-way ANOVA followed by post-hoc Fisher's LSD test |
|    | control-NCM                      | Mir (2.5 μM)-NCM<br>Mir (5 μM)-NCM<br>Mir (10 μM)-NCM                                                     | 16<br>13<br>11<br>14  | p = 0.0046 (vs. control-NCM group)<br>p = 0.0011 (vs. control-NCM group)<br>p = 0.0014 (vs. control-NCM group)                                                                                                                                                                                                                                                                                                                                                                                                                                          |                   |                                                      |
| 6h | number of MT-immunopositive cell |                                                                                                           |                       | p < 0.0001                                                                                                                                                                                                                                                                                                                                                                                                                                                                                                                                              | F (3,118) = 8.177 | one-way ANOVA followed by post-hoc Fisher's LSD test |
|    | control-NCM                      | control-NCM + WAY<br>Mir (5 μM)-NCM<br>Mir (5 μM)-NCM + WAY                                               | 30<br>29<br>30<br>30  | p = 0.401 (vs. control-NCM group)<br>p < 0.0001 (vs. control-NCM group)<br>p = 0.0419 (vs. control-NCM group)<br>p = 0.0107 (vs. Mir-NCM group)                                                                                                                                                                                                                                                                                                                                                                                                         |                   |                                                      |
| 6i | MT density                       |                                                                                                           |                       | p = 0.0159                                                                                                                                                                                                                                                                                                                                                                                                                                                                                                                                              | F (3,102) = 3.609 | one-way ANOVA followed by post-hoc Fisher's LSD test |
|    | control-NCM + control            | control-NCM + WAY<br>Mir (5 μM)-NCM + control<br>Mir (5 μM)-NCM + WAY                                     | 25<br>26<br>26<br>26  | p = 0.307 (vs. control-NCM group)<br>p = 0.0406 (vs. control-NCM group)<br>p = 0.763 (vs. control-NCM group)<br>p = 0.0182 (vs. Mir-NCM group)                                                                                                                                                                                                                                                                                                                                                                                                          |                   |                                                      |

|                         |                     |                         |                                                                   |                                                             |                   |                                                      |  |  |
|-------------------------|---------------------|-------------------------|-------------------------------------------------------------------|-------------------------------------------------------------|-------------------|------------------------------------------------------|--|--|
| 7a                      | TH positive cells   |                         |                                                                   | p < 0.0001                                                  | F (5,35) = 10.88  | one-way ANOVA followed by post-hoc Fisher's LSD test |  |  |
|                         | control             | control-NCM-ACM         | 6                                                                 |                                                             |                   |                                                      |  |  |
|                         | 6-OHDA (50 $\mu$ M) | Mir-NCM-ACM             | 6                                                                 | p = 0.666 (vs. control-NCM-ACM+6-OHDA (0 $\mu$ M) group)    |                   |                                                      |  |  |
|                         |                     | Mir-NCM + WAY100635-ACM | 6                                                                 | p = 0.688 (vs. control-NCM-ACM+6-OHDA (0 $\mu$ M) group)    |                   |                                                      |  |  |
| control-NCM-ACM         |                     | 6                       | p < 0.0001 (vs. control-NCM-ACM+6-OHDA(0 $\mu$ M) group)          |                                                             |                   |                                                      |  |  |
|                         |                     | Mir-NCM-ACM             | 6                                                                 | p = 0.0061 (vs. Mir-NCM-ACM+6-OHDA (0 $\mu$ M) group)       |                   |                                                      |  |  |
|                         |                     | Mir-NCM-ACM             | 6                                                                 | p = 0.0273 (vs. control-NCM-ACM+6-OHDA (50 $\mu$ M) group)  |                   |                                                      |  |  |
|                         |                     | Mir-NCM + WAY100635-ACM | 6                                                                 | p = 0.0002 (vs. Mir-NCM + WAY-ACM+6-OHDA (0 $\mu$ M) group) |                   |                                                      |  |  |
|                         |                     |                         | 6                                                                 | p = 0.358 (vs. control-NCM-ACM+6-OHDA (50 $\mu$ M) group)   |                   |                                                      |  |  |
|                         |                     |                         | 6                                                                 | p = 0.175 (vs. Mir-NCM-ACM+6-OHDA (50 $\mu$ M) group)       |                   |                                                      |  |  |
| 7b                      | MT-1 concentration  |                         |                                                                   | p = 0.00403                                                 | F (1,11) = 13.782 | one-way ANOVA followed by post-hoc Fisher's LSD test |  |  |
|                         |                     | control-NCM-ACM         | 6                                                                 |                                                             |                   |                                                      |  |  |
|                         |                     | Mir-NCM-ACM             | 6                                                                 | p = 0.004 (vs. control-NCM-ACM)                             |                   |                                                      |  |  |
| 7c                      | TH positive cells   |                         |                                                                   | p < 0.0001                                                  | F (5,35) = 36.334 | one-way ANOVA followed by post-hoc Fisher's LSD test |  |  |
|                         | control             | control-NCM-ACM         | 6                                                                 |                                                             |                   |                                                      |  |  |
|                         | 6-OHDA (50 $\mu$ M) | Mir-NCM-ACM             | 6                                                                 | p = 0.758 (vs. control-NCM-ACM+6-OHDA (0 $\mu$ M) group)    |                   |                                                      |  |  |
|                         |                     | Mir-NCM-ACM + MT-1/2 Ab | 6                                                                 | p = 0.874 (vs. control-NCM-ACM+6-OHDA (0 $\mu$ M) group)    |                   |                                                      |  |  |
|                         |                     | control-NCM-ACM         | 6                                                                 | p < 0.0001 (vs. control-NCM-ACM+6-OHDA (0 $\mu$ M) group)   |                   |                                                      |  |  |
|                         |                     | Mir-NCM-ACM             | 6                                                                 | p < 0.0001 (vs. Mir-NCM-ACM+6-OHDA (0 $\mu$ M) group)       |                   |                                                      |  |  |
|                         |                     | Mir-NCM-ACM             | 6                                                                 | p = 0.0347 (vs. control-NCM-ACM+6-OHDA (50 $\mu$ M) group)  |                   |                                                      |  |  |
| Mir-NCM-ACM + MT-1/2 Ab |                     | 6                       | p < 0.0001 (vs. Mir-NCM-ACM + MT-1/2 Ab+6-OHDA (0 $\mu$ M) group) |                                                             |                   |                                                      |  |  |
|                         |                     | Mir-NCM-ACM + MT-1/2 Ab | 6                                                                 | p = 0.745 (vs. control-NCM-ACM+6-OHDA (50 $\mu$ M) group)   |                   |                                                      |  |  |
|                         |                     |                         | 6                                                                 | p = 0.0165 (vs. Mir-NCM-ACM+6-OHDA (50 $\mu$ M) group)      |                   |                                                      |  |  |

| Figure number                       | group                  | n                                                   | P value                                                                 | F/t Values                                                         | Test type                                            |  |
|-------------------------------------|------------------------|-----------------------------------------------------|-------------------------------------------------------------------------|--------------------------------------------------------------------|------------------------------------------------------|--|
| supplemental fig. 2b                | S100 $\beta$           |                                                     | p = 0.815                                                               | F (1,21) = 0.0558                                                  | one-way ANOVA followed by post-hoc Fisher's LSD test |  |
|                                     | vehicle                | 5                                                   |                                                                         |                                                                    |                                                      |  |
|                                     | mirtazapine (16 mg/kg) | 6                                                   |                                                                         |                                                                    |                                                      |  |
|                                     | S100 $\beta$ & MT      |                                                     | p = 0.0469                                                              | F (1,21) = 4.4483                                                  | one-way ANOVA followed by post-hoc Fisher's LSD test |  |
| vehicle                             | 5                      |                                                     |                                                                         |                                                                    |                                                      |  |
| mirtazapine (16 mg/kg)              | 6                      | p = 0.0469 (vs. vehicle-treated group)              |                                                                         |                                                                    |                                                      |  |
| supplemental fig. 3a                | S100 $\beta$           |                                                     | p = 0.00016                                                             | F (5,35) = 7.173                                                   | one-way ANOVA followed by post-hoc Fisher's LSD test |  |
|                                     | control side           | vehicle                                             | 6                                                                       |                                                                    |                                                      |  |
|                                     |                        | mirtazapine (5 mg/kg)                               | 6                                                                       | p = 0.275 (vs. same side of vehicle-treated group)                 |                                                      |  |
|                                     | mirtazapine (16 mg/kg) | 6                                                   | p = 0.0008 (vs. same side of vehicle-treated group)                     |                                                                    |                                                      |  |
|                                     | lesioned side          | vehicle                                             | 6                                                                       | p = 0.0008 (vs. control side of each group)                        |                                                      |  |
|                                     |                        | mirtazapine (5 mg/kg)                               | 6                                                                       | p = 0.679 (vs. same side of vehicle-treated group)                 |                                                      |  |
|                                     | mirtazapine (16 mg/kg) | 6                                                   | p = 0.0339 (vs. control side of each group)                             |                                                                    |                                                      |  |
|                                     |                        |                                                     |                                                                         | p = 0.196 (vs. same side of vehicle-treated group)                 |                                                      |  |
|                                     |                        |                                                     |                                                                         | p = 0.196 (vs. control side of each group)                         |                                                      |  |
|                                     | S100 $\beta$ & MT      |                                                     | p = 0.0651                                                              | F (5,35) = 2.347                                                   | one-way ANOVA followed by post-hoc Fisher's LSD test |  |
| control side                        | vehicle                | 6                                                   |                                                                         |                                                                    |                                                      |  |
|                                     | mirtazapine (5 mg/kg)  | 6                                                   |                                                                         |                                                                    |                                                      |  |
| mirtazapine (16 mg/kg)              | 6                      |                                                     |                                                                         |                                                                    |                                                      |  |
| lesioned side                       | vehicle                | 6                                                   |                                                                         |                                                                    |                                                      |  |
|                                     | mirtazapine (5 mg/kg)  | 6                                                   |                                                                         |                                                                    |                                                      |  |
| mirtazapine (16 mg/kg)              | 6                      |                                                     |                                                                         |                                                                    |                                                      |  |
| supplemental fig. 3b                | GFAP                   |                                                     | p < 0.0001                                                              | F (5,33) = 8.141                                                   | one-way ANOVA followed by post-hoc Fisher's LSD test |  |
|                                     | control side           | vehicle                                             | 6                                                                       |                                                                    |                                                      |  |
|                                     |                        | mirtazapine (5 mg/kg)                               | 6                                                                       | p = 0.0041 (vs. same side of vehicle-treated group)                |                                                      |  |
|                                     | mirtazapine (16 mg/kg) | 6                                                   | p = 0.0002 (vs. same side of vehicle-treated group)                     |                                                                    |                                                      |  |
|                                     | lesioned side          | vehicle                                             | 6                                                                       | p = 0.0056 (vs. control side of each group)                        |                                                      |  |
|                                     |                        | mirtazapine (5 mg/kg)                               | 6                                                                       | p = 0.118 (vs. same side of vehicle-treated group)                 |                                                      |  |
|                                     | mirtazapine (16 mg/kg) | 6                                                   | p = 0.1 (vs. control side of each group)                                |                                                                    |                                                      |  |
|                                     |                        |                                                     |                                                                         | p = 0.0086 (vs. same side of vehicle-treated group)                |                                                      |  |
|                                     |                        |                                                     |                                                                         | p = 0.0835 (vs. control side of each group)                        |                                                      |  |
|                                     | GFAP & MT              |                                                     | p = 0.00163                                                             | F (5,33) = 5.23                                                    | one-way ANOVA followed by post-hoc Fisher's LSD test |  |
| control side                        | vehicle                | 6                                                   |                                                                         |                                                                    |                                                      |  |
|                                     | mirtazapine (5 mg/kg)  | 6                                                   | p = 0.127 (vs. same side of vehicle-treated group)                      |                                                                    |                                                      |  |
| mirtazapine (16 mg/kg)              | 6                      | p = 0.0034 (vs. same side of vehicle-treated group) |                                                                         |                                                                    |                                                      |  |
| lesioned side                       | vehicle                | 6                                                   | p = 0.0142 (vs. control side of each group)                             |                                                                    |                                                      |  |
|                                     | mirtazapine (5 mg/kg)  | 6                                                   | p = 0.679 (vs. same side of vehicle-treated group)                      |                                                                    |                                                      |  |
| mirtazapine (16 mg/kg)              | 6                      | p = 0.108 (vs. control side of each group)          |                                                                         |                                                                    |                                                      |  |
|                                     |                        |                                                     | p = 0.0556 (vs. same side of vehicle-treated group)                     |                                                                    |                                                      |  |
|                                     |                        |                                                     | p = 0.119 (vs. control side of each group)                              |                                                                    |                                                      |  |
| supplemental fig. 4                 |                        |                                                     | p < 0.0001                                                              | F (5,35) = 7.96                                                    | one-way ANOVA followed by post-hoc Fisher's LSD test |  |
|                                     | control                | control-NCM-ACM                                     | 6                                                                       |                                                                    |                                                      |  |
|                                     |                        | Mir(10 $\mu$ M)-NCM-ACM                             | 6                                                                       | p = 0.836 (vs. control-NCM-ACM+6-OHDA (0 $\mu$ M) group)           |                                                      |  |
|                                     |                        | Mir(10 $\mu$ M)-NCM + WAY100635-ACM                 | 6                                                                       | p = 0.559 (vs. control-NCM-ACM+6-OHDA (0 $\mu$ M) group)           |                                                      |  |
|                                     | 6-OHDA (50 $\mu$ M)    | control-NCM-ACM                                     | 6                                                                       | p = 0.0003 (vs. control-NCM-ACM+6-OHDA (0 $\mu$ M) group)          |                                                      |  |
|                                     |                        | Mir(10 $\mu$ M)-NCM-ACM                             | 6                                                                       | p = 0.0096 (vs. Mir (10 $\mu$ M)-NCM-ACM+6-OHDA (0 $\mu$ M) group) |                                                      |  |
|                                     |                        | Mir(10 $\mu$ M)-NCM-ACM                             | 6                                                                       | p = 0.148 (vs. control-NCM-ACM+6-OHDA (50 $\mu$ M) group)          |                                                      |  |
| Mir(10 $\mu$ M)-NCM + WAY100635-ACM |                        | 6                                                   | p = 0.0007 (vs. Mir(10 $\mu$ M)-NCM + WAY-ACM+6-OHDA (0 $\mu$ M) group) |                                                                    |                                                      |  |
|                                     |                        |                                                     | p = 0.544 (vs. Mir (10 $\mu$ M)-NCM-ACM+6-OHDA (50 $\mu$ M) group)      |                                                                    |                                                      |  |
